# Supplementary material
Source: publisher figshare collection journal article supplement (https://tandf.figshare.com/articles/dataset/_/7361429)

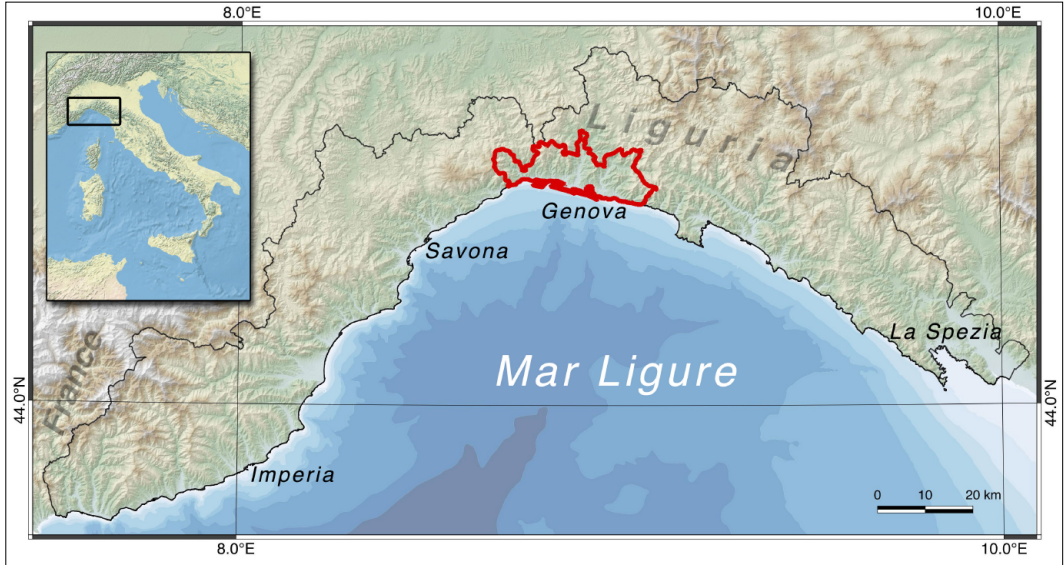

|                                                                                                     |        |                    |                          |
|-----------------------------------------------------------------------------------------------------|--------|--------------------|--------------------------|
|  Municipality border |        |                    |                          |
| Municipality area (km²):                                                                            | 240.3  | UNESCO zone (km²): | 1.1                      |
| Inhabitants:                                                                                        | 587744 |                    |                          |
| Landslides                                                                                          | (n°)   | (km²)              | Flood hazard zones (km²) |
| Active/Reactivated:                                                                                 | 486    | 6.0                | Very high: 4.16          |
| Inactive/Dormant:                                                                                   | 568    | 14.6               | Medium: 6.1              |
| Inactive/Relict:                                                                                    | 81     | 3.3                | Low: 7.7                 |

|                          |                    |                            |                             |                       |                               |
|--------------------------|--------------------|----------------------------|-----------------------------|-----------------------|-------------------------------|
| FLOOD HAZARD ZONES       | LANDSLIDES         | MOUNTAIN SLOPE DEFORMATION | CULTURAL HERITAGE SITES     | ADMINISTRATIVE LIMITS | BUILDINGS AND INFRASTRUCTURES |
| Very high <sup>(1)</sup> | Active/Reactivated | DSGSD                      | UNESCO zone                 | District              | Buildings                     |
| Medium <sup>(6)</sup>    | Inactive/Dormant   |                            | Cultural heritage sites     |                       | Highway                       |
| Low <sup>(1)</sup>       | Inactive/Relict    |                            | Cultural heritages elements |                       | Road                          |
|                          |                    |                            |                             |                       | Railway                       |
|                          |                    |                            |                             |                       | Railway gallery               |
|                          |                    |                            |                             |                       | Gallery                       |

<sup>(1)</sup> flood occurrence with peak flow corresponding to return period of 50 years  
<sup>(6)</sup> flood occurrence with peak flow corresponding to return period of 200 years  
<sup>(1)</sup> flood occurrence with peak flow corresponding to return period of 500 years

|                       | Landslides per typology and activity (%) |                  |                 |
|-----------------------|------------------------------------------|------------------|-----------------|
|                       | Active/Reactivated                       | Inactive/Dormant | Inactive/Relict |
| Fall/Topple           | 3.0                                      | 1.1              | 0.1             |
| Flow                  | 3.0                                      | 2.2              | 0.5             |
| Complex               | 18.5                                     | 21.0             | 5.0             |
| Slide (rotat./trans.) | 6.9                                      | 12.0             | 1.4             |
| Soil slip             | 11.7                                     | 13.6             | 0.1             |

| Cultural heritage sites    | n° |
|----------------------------|----|
| Historical aqueduct        | 20 |
| Historical/archeological   | 62 |
| Historical buildings       | 19 |
| High public interest areas | 15 |

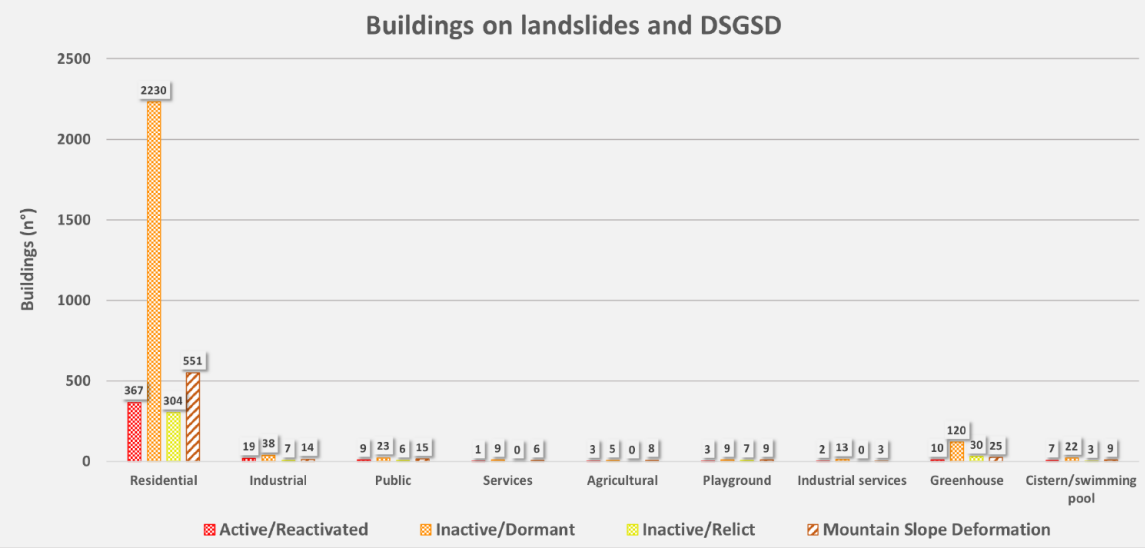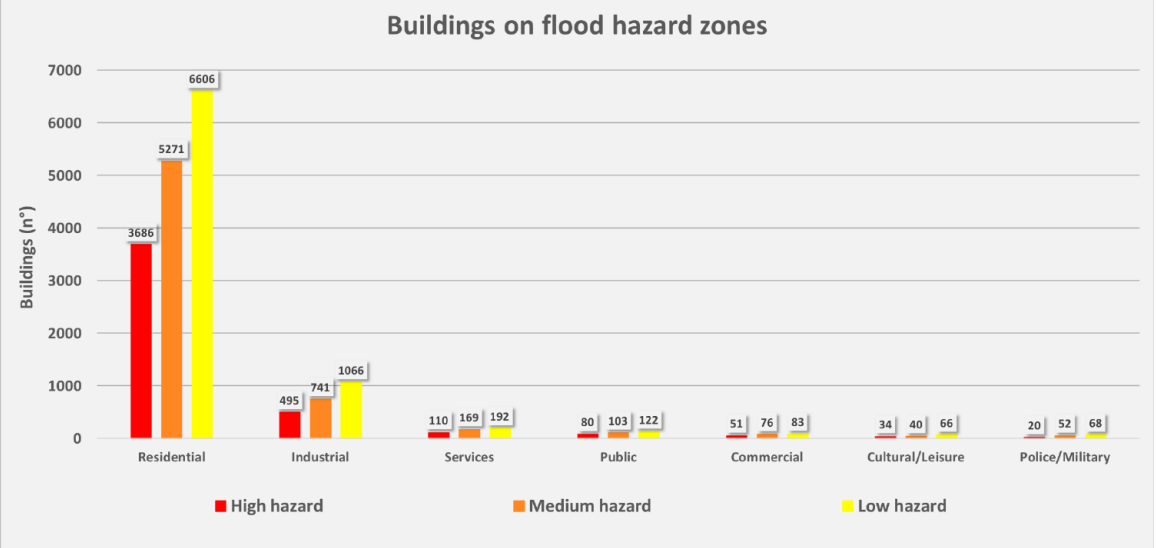

Buildings and roads on landslides, mountain slope deformation and in flood hazard zones

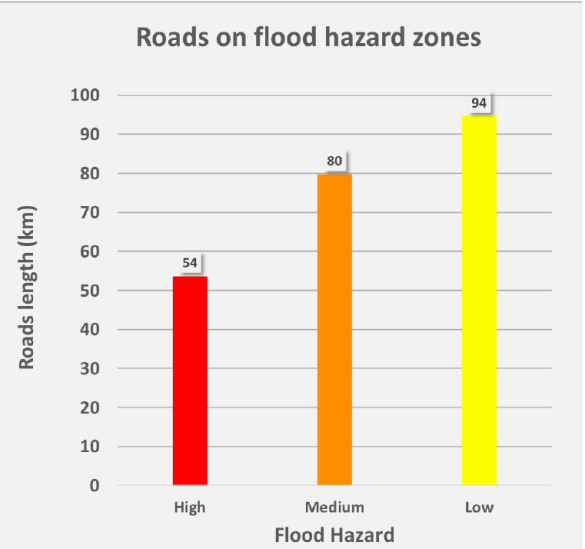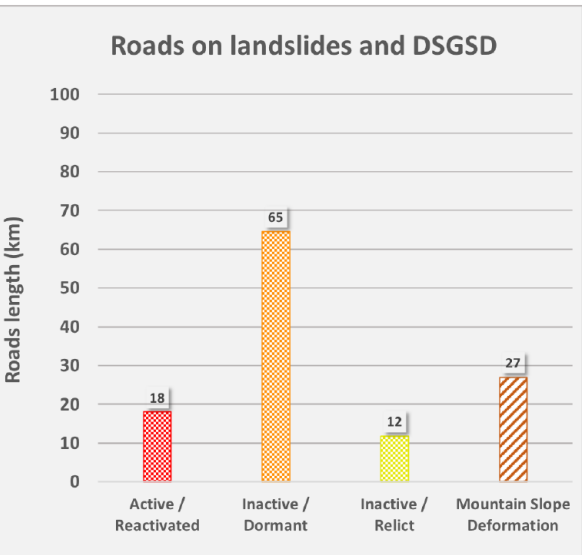

| Districts |                      |             |      |               |             |      |              |             |      |              |             |      |             |             |      |      |             |
|-----------|----------------------|-------------|------|---------------|-------------|------|--------------|-------------|------|--------------|-------------|------|-------------|-------------|------|------|-------------|
| Code      | Name                 | Inhabitants | Code | Name          | Inhabitants | Code | Name         | Inhabitants | Code | Name         | Inhabitants | Code | Name        | Inhabitants | Code | Name | Inhabitants |
| 1         | CREVARI              | 1175        | 16   | TEGLIA        | 4699        | 31   | LAGACCIO     | 12202       | 46   | FEREGGIANO   | 8742        | 61   | S. MARTINO  | 9146        |      |      |             |
| 2         | VOLTRI               | 11048       | 17   | BEGATO        | 4357        | 32   | OREGINA      | 11759       | 47   | MARASSI      | 10949       | 62   | ALBARO      | 8687        |      |      |             |
| 3         | CA NUOVA             | 6108        | 18   | BOLZANO       | 13156       | 33   | PRE          | 7665        | 48   | FORTE QUEZZI | 8778        | 63   | S. GIULIANO | 8340        |      |      |             |
| 4         | PALMARO              | 7250        | 19   | MOREGO        | 1602        | 34   | MADDALENA    | 5464        | 49   | PARENZO      | 14605       | 64   | LIDO        | 5753        |      |      |             |
| 5         | PRA'                 | 6827        | 20   | S. QUIRICO    | 3990        | 35   | MOLO         | 11386       | 50   | S. PANTALEO  | 6011        | 65   | PUGGIA      | 5418        |      |      |             |
| 6         | CASTELLUCCIO         | 5184        | 21   | PONTEDECIMO   | 8117        | 36   | S. NICOLA    | 8210        | 51   | MONTESIGNANO | 13061       | 66   | STURLA      | 7969        |      |      |             |
| 7         | PEGLI                | 16494       | 22   | CORNIGLIANO   | 13514       | 37   | CASTELLETTO  | 11830       | 52   | S. EUSEBIO   | 2584        | 67   | QUARTO      | 7792        |      |      |             |
| 8         | MULTEDO              | 4543        | 23   | CAMPI         | 7114        | 38   | MANIN        | 7114        | 53   | MOLASSANA    | 9158        | 68   | QUARTARA    | 5557        |      |      |             |
| 9         | SESTRI               | 18191       | 24   | CAMPASSO      | 8718        | 39   | S. VINCENZO  | 5128        | 54   | DORIA        | 4252        | 69   | CASTAGNA    | 7630        |      |      |             |
| 10        | S. GIOVANNI BATTISTA | 14122       | 25   | S. GAETANO    | 8940        | 40   | CARIGNANO    | 7182        | 55   | PRATO        | 5642        | 70   | QUINTO      | 8324        |      |      |             |
| 11        | CALCINARA            | 9956        | 26   | SAMPIERDARENA | 8522        | 41   | FOCE         | 5376        | 56   | BAVARI       | 1072        | 71   | NERVI       | 10586       |      |      |             |
| 12        | BORZOLI EST          | 2284        | 27   | BELVEDERE     | 8261        | 42   | BRIGNOLE     | 10305       | 57   | S. DESIDERIO | 1900        |      |             |             |      |      |             |
| 13        | BORZOLI OVEST        | 2482        | 28   | S. BARTOLOMEO | 8776        | 43   | S. AGATA     | 9063        | 58   | APPARIZIONE  | 2604        |      |             |             |      |      |             |
| 14        | CERTOSA              | 12590       | 29   | ANGELI        | 10535       | 44   | S. FRUTTUOSO | 24547       | 59   | BORGORATTI   | 8829        |      |             |             |      |      |             |
| 15        | RIVAROLO             | 9103        | 30   | S. TEODORO    | 10107       | 45   | QUEZZI       | 10629       | 60   | CHIAPPETO    | 5886        |      |             |             |      |      |             |

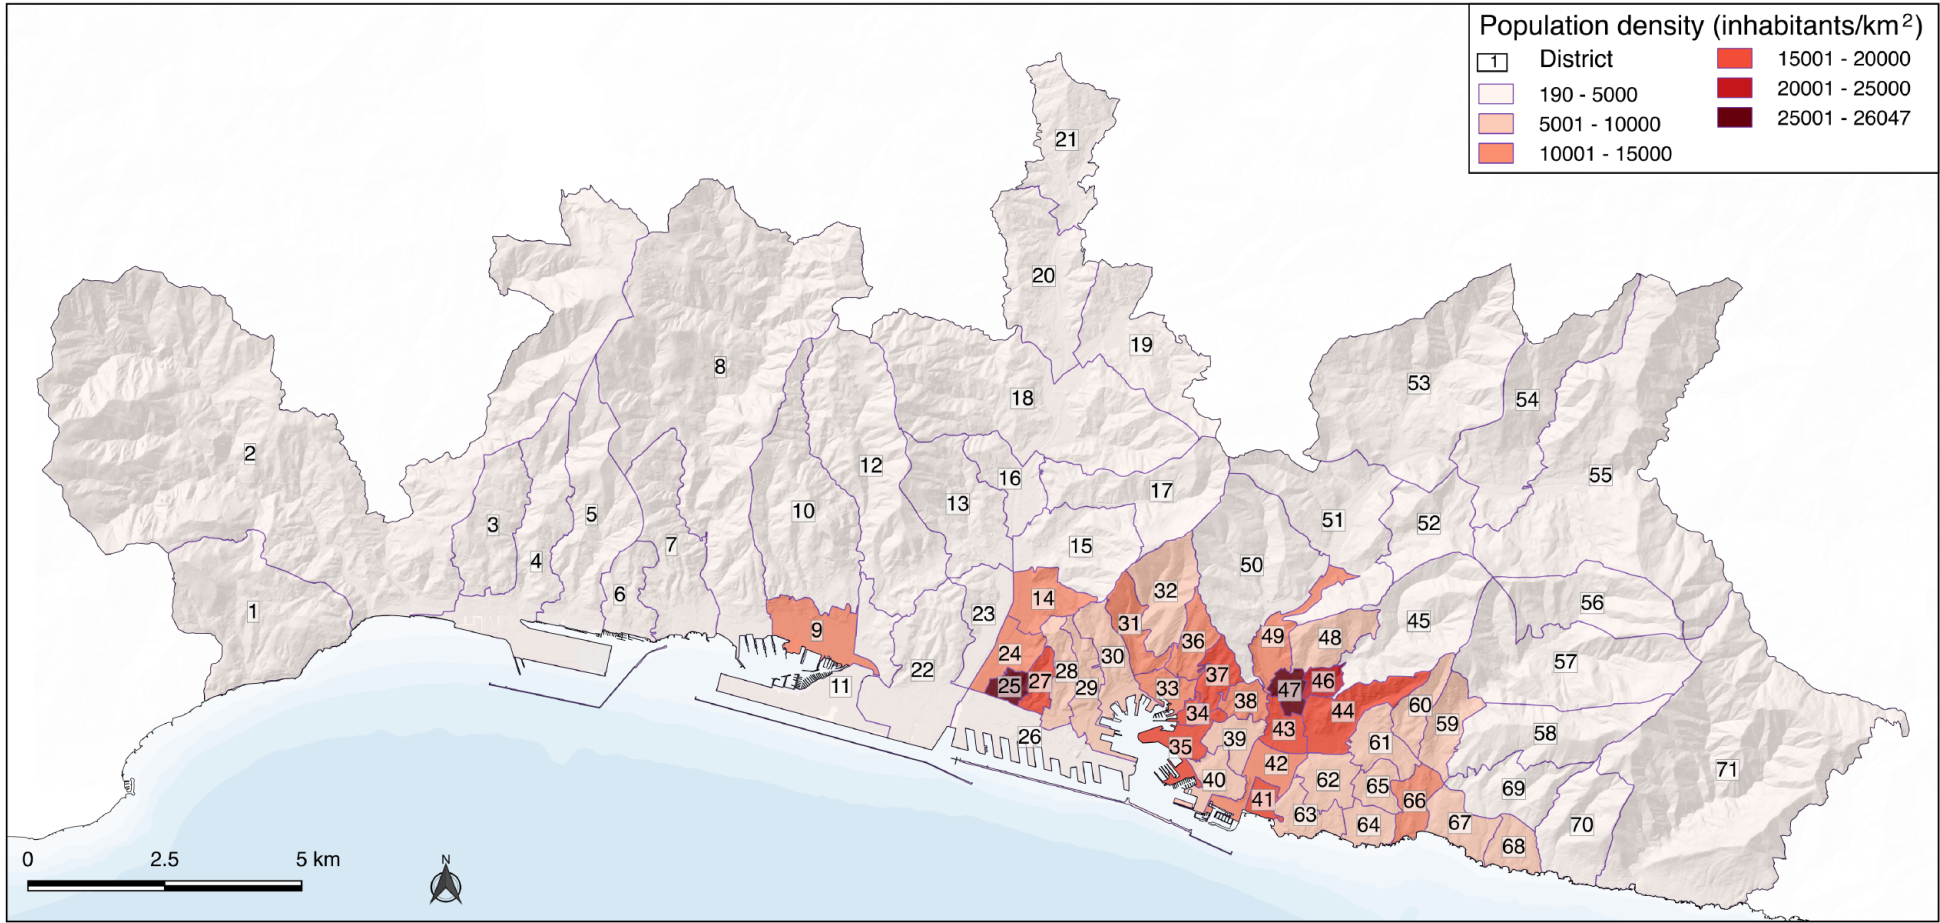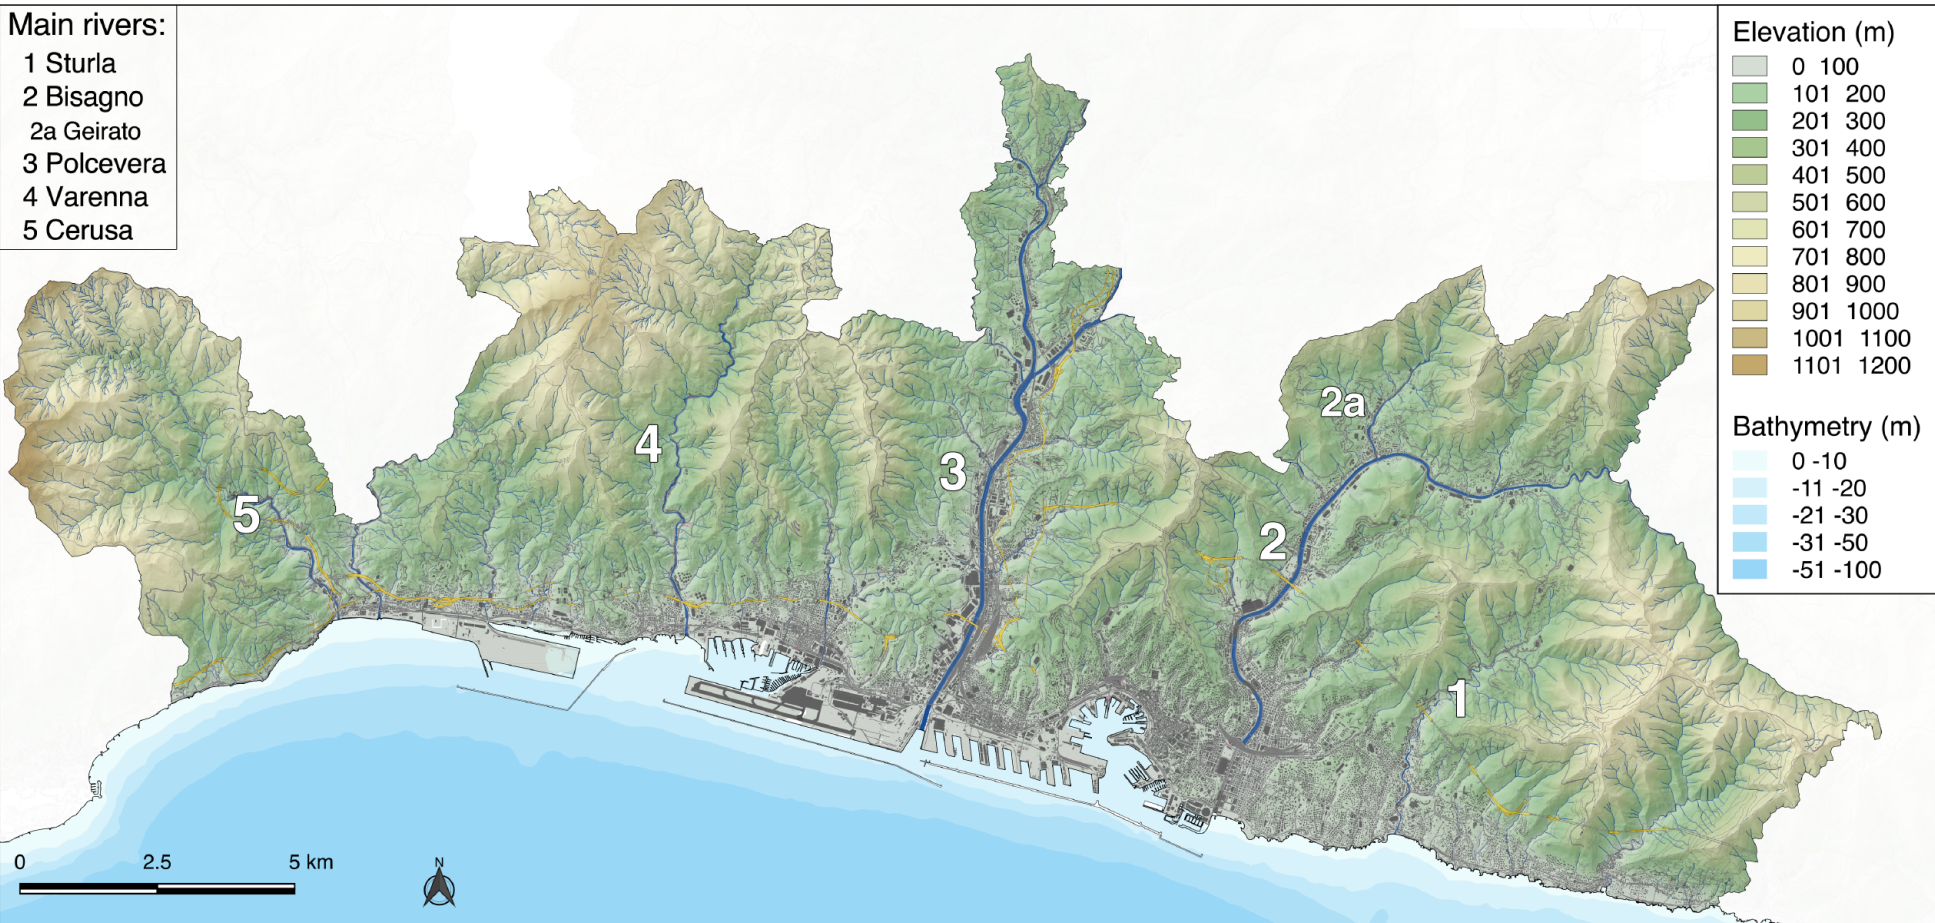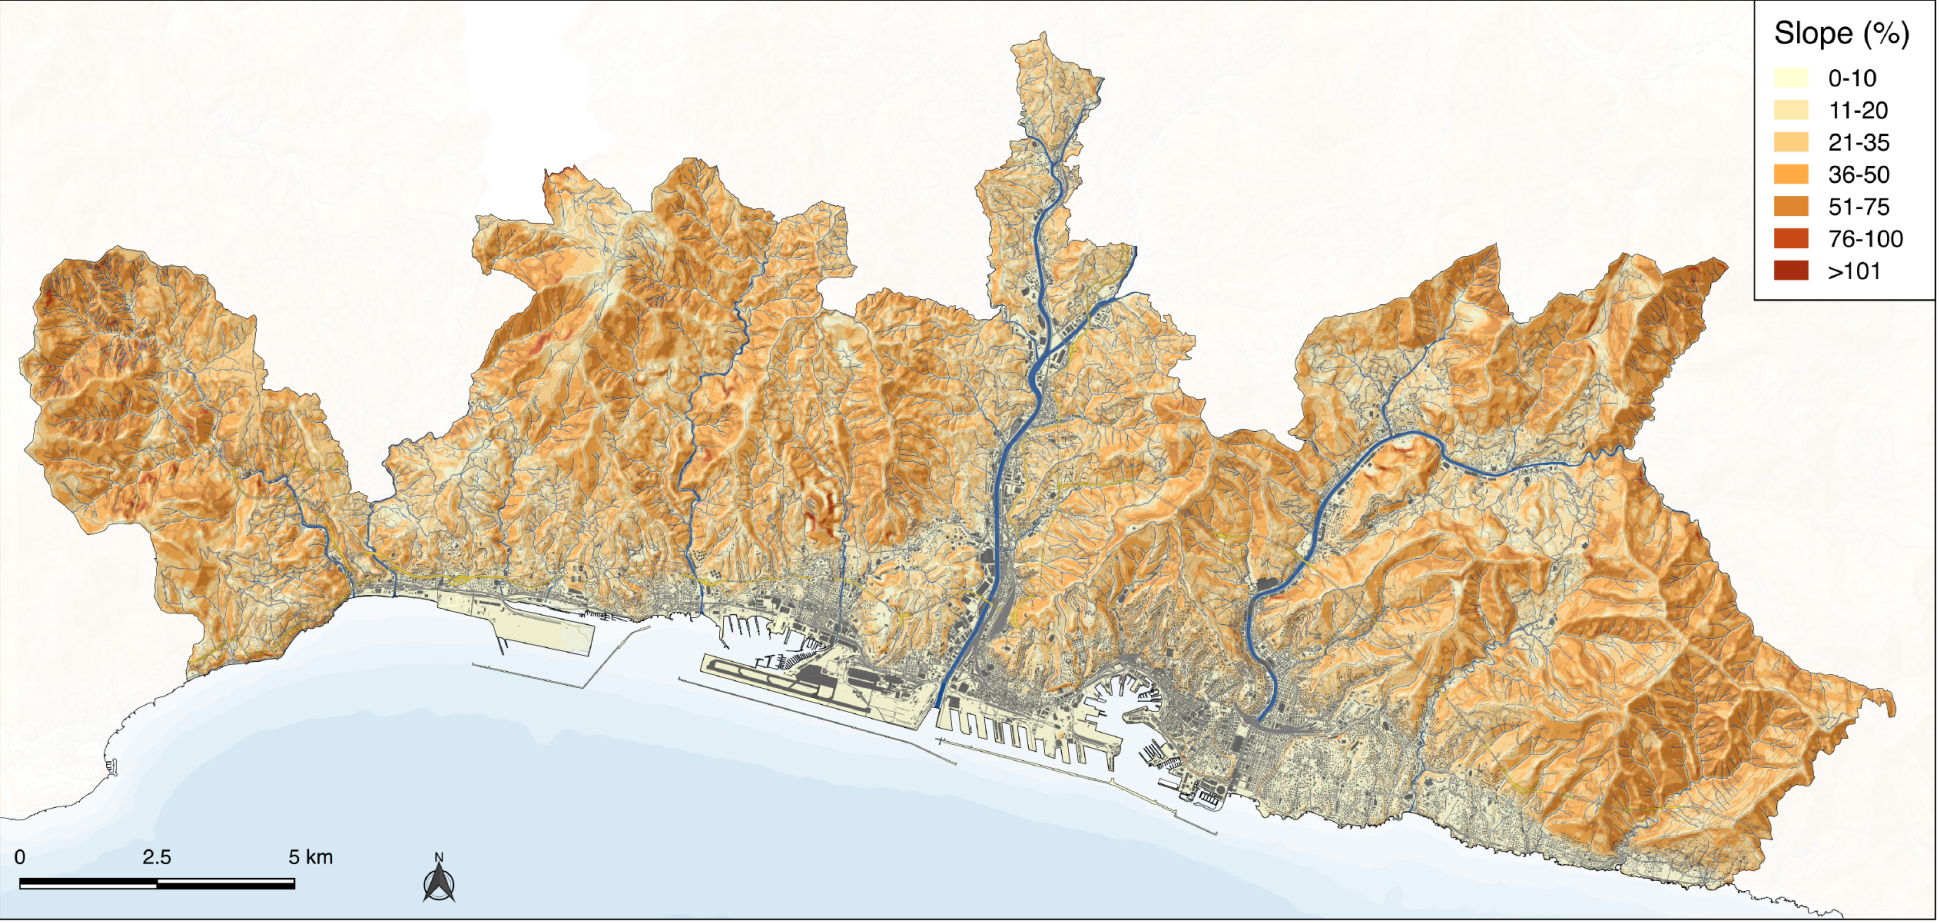

Supplement: Supplementary file 1 [file 1]
